# Supplementary material for: Versatile nanoporous bimetallic phosphides towards electrochemical water splitting
Source: Royal Society of Chemistry journal article supplement (doi:10.1039/c6ee01109h), 2016-01-01
Supplement: c6ee01109h1.pdf [file c6ee01109h1.pdf]

## Supplementary information

### Versatile nanoporous bimetallic phosphides towards electrochemical water splitting

Yongwen Tan,<sup>a,b</sup> Hao Wang,<sup>b</sup> Pan Liu,<sup>a,b</sup> Yuhao Shen,<sup>b,c</sup> Chun Cheng,<sup>b</sup> Akihiko Hirata,<sup>b</sup> Takeshi Fujita,<sup>b</sup> Zheng Tang,<sup>c</sup> Mingwei Chen,<sup>a,b,d\*</sup>

<sup>a</sup> State Key Laboratory of Metal Matrix Composites, School of Materials Science and Engineering, Shanghai Jiao Tong University, Shanghai 200030, PR China

<sup>b</sup> WPI Advanced Institute for Materials Research, Tohoku University, Sendai 980-8577, Japan.

<sup>c</sup> Key Laboratory of Polar Materials and Devices, East China Normal University, Shanghai 200062, China

<sup>d</sup>CREST, JST, 4-1-8 Honcho Kawaguchi, Saitama 332-0012, Japan

\*Correspondence to: [mwchen@wpi-aimr.tohoku.ac.jp](mailto:mwchen@wpi-aimr.tohoku.ac.jp)

#### Supplementary Methods, Figures, Table and Discussion

##### Methods

**Preparation of precursor Co-Fe-P ribbons.** Co-Fe-P alloy ingots were prepared by arc melting Co<sub>2</sub>P, pure Co and pure Fe under an argon atmosphere. The Co:Fe:P atomic ratios were designed in a wide composition range to fabricate np-(Co<sub>1-x</sub>Fe<sub>x</sub>)<sub>2</sub>P. A melt spinning technique was introduced to rapidly quench the re-melt the alloy ingots by the cold surface of a spinning copper roller to achieve a homogeneous nanocrystalline two-phase ribbons with the dimensions of ~1 mm wide and 20 μm thick. The grain sizes of the ribbons were tuned by changing the rotation rates of the

copper roller from 1,000 revolutions per minute (1 Krpm) to 5 Krpm. The ribbons were cut into thin plates with dimensions of 1 mm wide and 10 mm long for the fabrication of nanoporous  $(\text{Co}_{1-x}\text{Fe}_x)_2\text{P}$  catalysts.

**Fabrication of np- $(\text{Co}_{1-x}\text{Fe}_x)_2\text{P}$ .** The Co-Fe-P ribbons were electrochemically etched in 0.5 M  $\text{H}_2\text{SO}_4$  solution in a standard three-electrode configuration with a Ag/AgCl electrode as the reference electrode and a graphite sheet as the counter electrode using an electrochemical workstation (Ivium Technology). The selective phase dissolution process was controlled by etching time. The applied potential was determined by the measurements of the critical oxidation potentials of the BCC CoFe phase and the  $(\text{Co}_{1-x}\text{Fe}_x)_2\text{P}$  compound. The np- $(\text{Co}_{1-x}\text{Fe}_x)_2\text{P}$  phosphides were obtained at a dealloying voltage of 0.03 V for 3000 s after the full dissolution of the BCC CoFe phase. The dealloyed samples were rinsed by deionized water for more than three times to remove the residual chemical substances within nanopore channels.

**Structural characterization.** XRD patterns of precursor Co-Fe-P ribbons and np- $(\text{Co}_{1-x}\text{Fe}_x)_2\text{P}$  phosphides were taken using a Rigaku Ultima X-ray diffractometer with Cu Ka radiation. Microstructure and chemical composition were inspected with a JEOL JIB-4600F SEM equipped with an Oxford energy dispersive X-ray spectroscopy. The HRTEM and STEM images were taken by a 200 kV JEOL JEM-2001F equipped with double spherical aberration (Cs) correctors for both the probe-forming and image-forming objective lenses. The chemical state and composition of the samples were characterized using X-ray photoelectron spectroscopy (XPS, AxIS-ULTRA-DLD) with Al Ka (mono) anode at energy of 150 W. Surface areas and pore

sizes of  $\text{np}-(\text{Co}_{1-x}\text{Fe}_x)_2\text{P}$  were measured by the Brunauer–Emmett–Teller (BET) method and Barrett-Joyner- Hallender (BJH) method at 77.0 K using a BELSORP-mini II (BEL. JAPAN. INC). The horizontal axis was normalized with the vapor pressure of nitrogen ( $P_0$ ) at 77.0 K (= 0.101 MPa). The samples were heated at 80°C under vacuum for 12 hours before the measurements. The mass of the sample were measured with an ultra-micro balance.

**Electrochemical characterizations.** The electrocatalytic activities of  $\text{np}-(\text{Co}_{1-x}\text{Fe}_x)_2\text{P}$  were tested at room temperature. HER and OER tests were conducted in a three-electrode cell by using an electrochemical workstation (lvium Technology. Linear scan voltammetry was constructed out at a scan rate of 2 mV s<sup>-1</sup> with an Ag/AgCl electrode as the reference electrode and a graphite sheet as the counter electrode. The electrolytes were 0.5 M H<sub>2</sub>SO<sub>4</sub> and 1.0 M KOH made with deionized water and were continuously purged with high-purity Ar. The reference electrode was calibrated to reversible hydrogen potential (RHE) using platinum electrode for both working and counter electrodes in the same electrolyte, and converted to RHE according to the Nernst equation ( $E_{\text{RHE}} = E_{\text{Ag/AgCl}} + E^0_{\text{Ag/AgCl}} + 0.0591\text{pH}$ ). Overall water splitting is performed in a two-electrode system. One  $\text{np}-(\text{Co}_{1-x}\text{Fe}_x)_2\text{P}$  ribbon (or IrO<sub>2</sub>) electrode acts as the positive electrode for OER and the other  $\text{np}-(\text{Co}_{1-x}\text{Fe}_x)_2\text{P}$  ribbon (or Pt/C) is used as the negative electrode for HER. All CV curves presented here were corrected for  $iR$  losses unless otherwise noted. The current densities are based on geometric areas. The Pt/C and IrO<sub>2</sub> inks were loaded on a glassy carbon electrode (surface area: 0.419 cm<sup>2</sup>), the loading mass is 1.0 mg/cm<sup>2</sup>.

**DFT calculations.** The spin-polarized density functional theory calculations were performed using a slab structural model by the Vienna *ab initio* simulation package (VASP) with the generalized gradient approximation (GGA). The plane wave pseudopotential with a cutoff energy at least 500.0 eV and a  $8 \times 8 \times 1$  Monkhorst-Pack  $k$  grid were adopted in the self-consistent convergence. By the structure relaxation the atomic geometries were fully optimized until the Hellmann-Feynman forces were less than 0.01 eV/Å. The hydrogen adsorption free energy was calculated as below:

—

where  $E_{H_2}$  is the energy of a gas phase hydrogen molecule,  $E_{H_2}^{ZPE}$  is the zero-point energy difference between the adsorbed state of the system and the gas state, and  $\Delta S$  is the entropy difference between the adsorbed state of the system and the gas phase standard state (300 K, 1 bar). As the contribution from the vibrational entropy of H in the adsorbed state is negligibly small, the entropy of hydrogen adsorption is defined as  $\Delta S \approx 1/2 S_{H_2}$ , where  $S_{H_2}$  is the entropy of  $H_2$  in the gas phase at the standard conditions. The Gibbs free energy with the overall corrections was taken as:

**Turnover frequency (TOF) calculations.** The TOF values are calculated according to the following equation<sup>1</sup>:

$$TOF (H_2 / s) = \frac{\#total\ hydrogen\ turnovers\ per\ geometric\ area}{\#active\ sites\ per\ geometric\ area}$$

The number of total hydrogen turnovers is calculated from the current density according to:

$$\begin{aligned} \#total\ hydrogen\ turnovers \\ = \left( j \frac{mA}{cm^2} \right) \left( \frac{1\ C\ s^{-1}}{1000\ mA} \right) \left( \frac{1\ mol\ e^{-}}{96485.3\ C} \right) \left( \frac{1\ mol\ H_2}{2\ mol\ e^{-}} \right) \left( \frac{6.022 \times 10^{23}\ H_2\ molecules}{1\ mol\ H_2} \right) \end{aligned}$$

$$= 3.12 \times 10^{15} \frac{H_2/s}{cm^2} \text{ per } \frac{mA}{cm^2}$$

We can estimate the number of active sites as the total number of surface sites from the roughness factor together with the unit cell of orthorhombic (Co<sub>1-x</sub>Fe<sub>x</sub>)<sub>2</sub>P. The surface sites (atoms cm<sup>-2</sup><sub>real</sub>) is estimated by using the method suggested by Ref. 1:

$$\#Surface\ sites = 2.017 \times 10^{15} \text{ atoms cm}^{-1}_{real}$$

Finally, the current density from the LSV polarization curves are converted into the TOF values at different operation potentials according to:

$$TOF = \frac{\left( 3.12 \times 10^{15} \frac{H_2/s}{cm^2} \text{ per } \frac{mA}{cm^2} \right) \times |j|}{(\#surface\ sites) \times (BET) \times (mass)}$$

For np-(Co<sub>0.52</sub>Fe<sub>0.48</sub>)<sub>2</sub>P with 20 nm pore size, the loading mass is ~2.5 mg. Therefore, the TOF values were calculated to be: *TOF* (0.05V vs RHE)=0.009 H<sub>2</sub> s<sup>-1</sup>, *TOF* (0.1V vs RHE)=0.1 H<sub>2</sub> s<sup>-1</sup>..

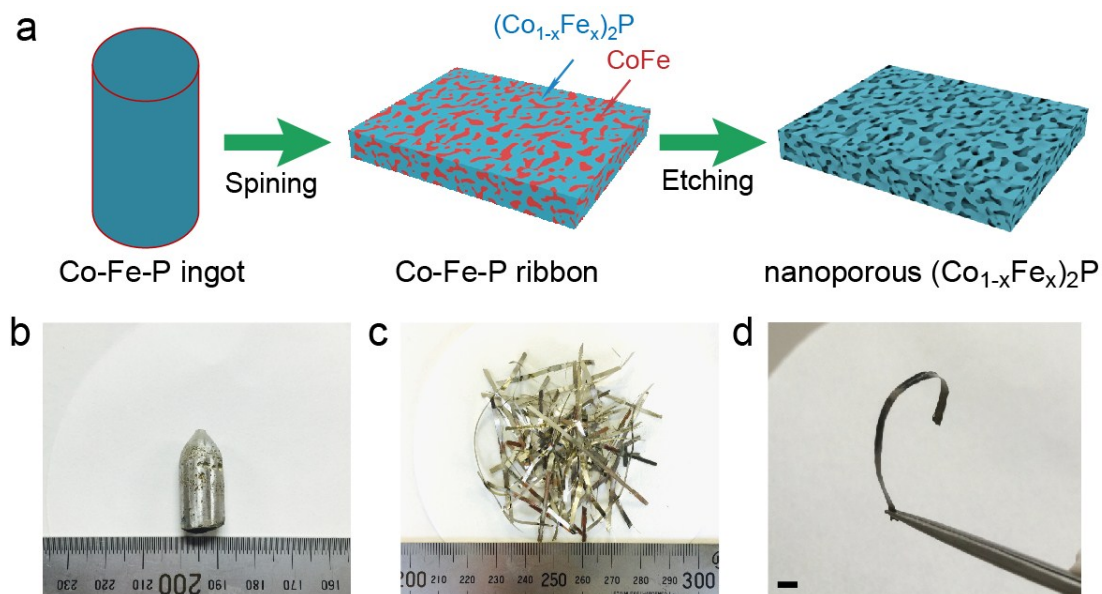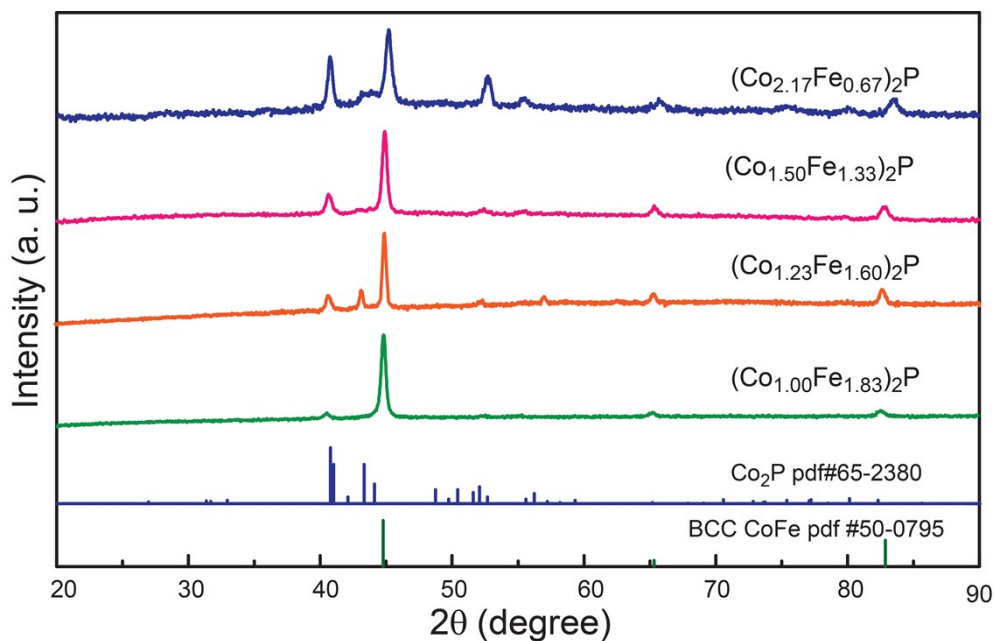

**Figure S2** X-ray diffraction pattern of Co-Fe-P precursor alloys with different Co/Fe ratios.

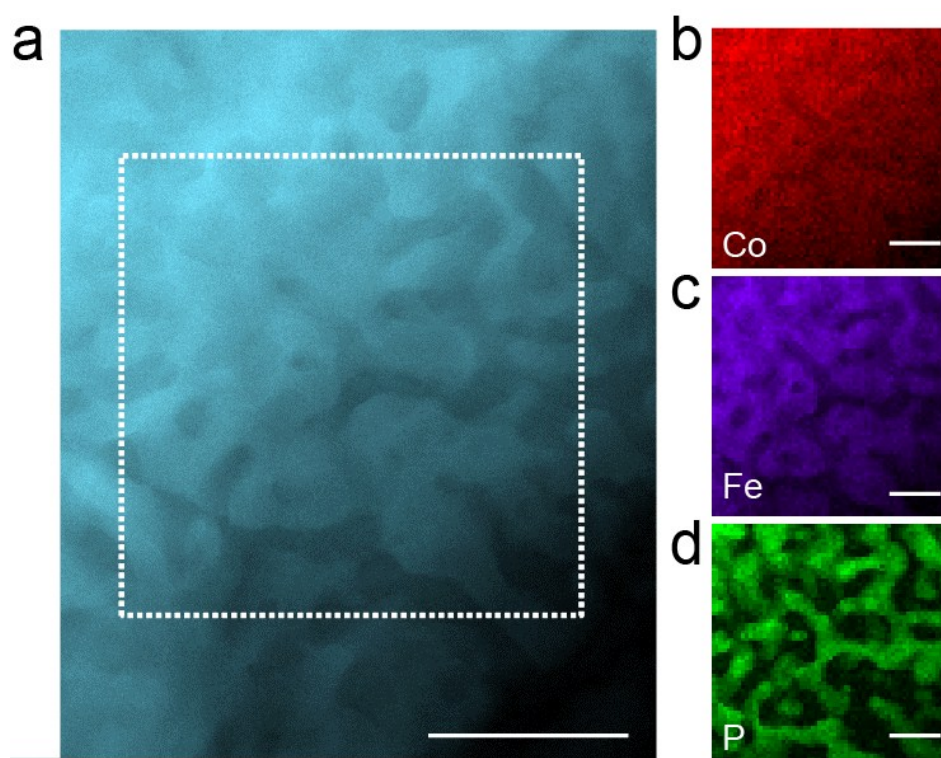

**Figure S3 TEM characterization of a rapidly-solidified Co-Fe-P precursor ribbons.** (a) High-angle annular dark-field scanning TEM image of the rapidly-solidified alloy. The marked box is the selected region for EDS chemical analysis. (b-d) TEM EDS element mappings of the alloy taken from the marked region in (a). Scale bars: (a) 50 nm, (b-d) 25 nm.

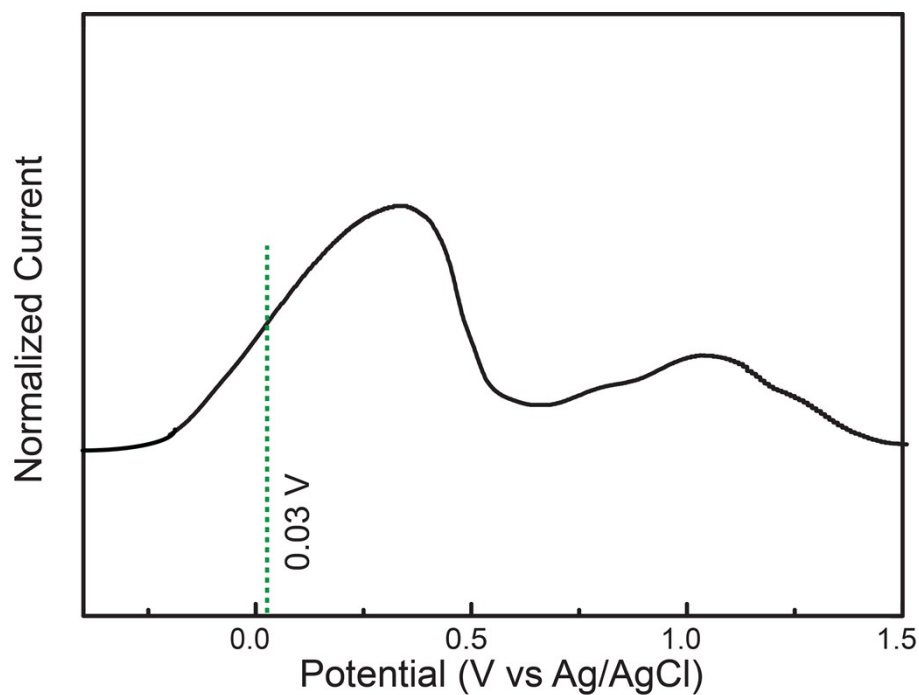

**Figure S4** The linear sweep voltammetry (LSV) curve of a Co-Fe-P alloy in 0.5 M  $\text{H}_2\text{SO}_4$ . There are two distinct peaks corresponding to the oxidation (or dissolution) of the BCC CoFe and  $(\text{Co}_{1-x}\text{Fe}_x)_2\text{P}$  phases, respectively. The critical dissolution potential of the CoFe phase is  $\sim 0.25$  V vs. Ag/AgCl while it is  $\sim 0.55$  V for the dissolution of the phosphide phase. In this study we selected the corrosion potential of 0.03 V for the selective dissolution of the BCC CoFe phase at which the  $(\text{Co}_{1-x}\text{Fe}_x)_2\text{P}$  phase is safe.



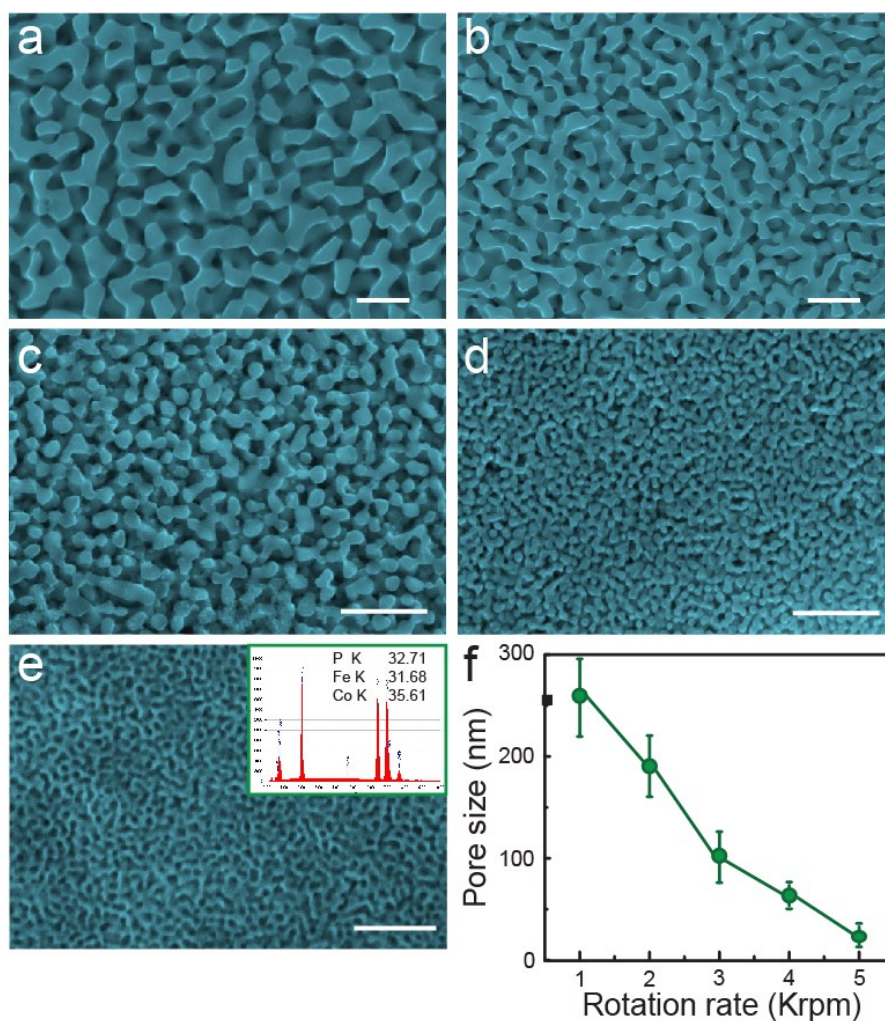

**Figure S5 SEM images of  $\text{np}-(\text{Co}_{0.52}\text{Fe}_{0.48})_2\text{P}$  with controllable pore sizes.** The pore sizes were tailored by the cooling rates of melt spinning (1,000 revolutions per minute (Krpm) of the copper roller) from (a) 1 Krpm; (b) 2 Krpm; (c) 3 Krpm; (d) 4 Krpm, (e) 5 Krpm; Inset is EDS spectra showing the ratio of the Co, Fe and P elements. **(f)** Tunable pore sizes as a function of the rotation rates. The pore size can be tailored from ~20 to 260 nm from 5 to 1 Krpm. Scale bars: (a-d) 500 nm; (e) 200 nm.

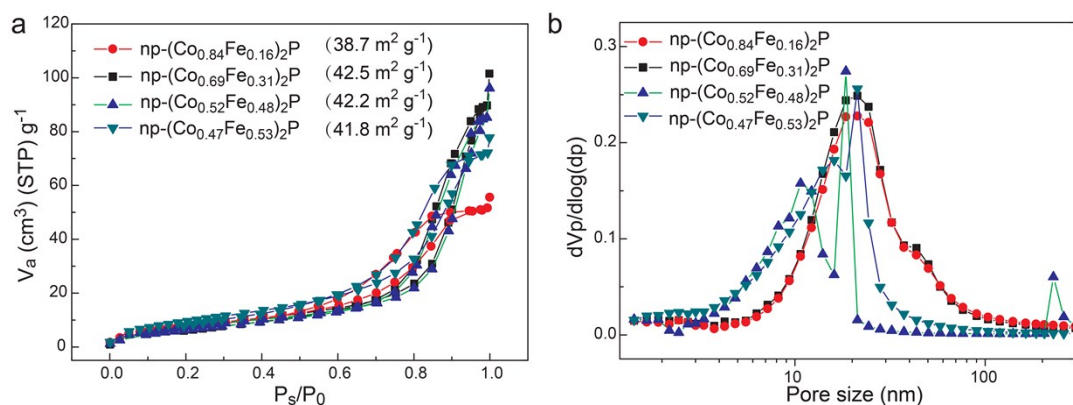

**Figure S6** (a) N<sub>2</sub> adsorbing-desorbing isotherm curves of np-(Co<sub>1-x</sub>Fe<sub>x</sub>)<sub>2</sub>P with different Co/Fe ratios. (b) The pore size distribution of as-prepared np-(Co<sub>1-x</sub>Fe<sub>x</sub>)<sub>2</sub>P.

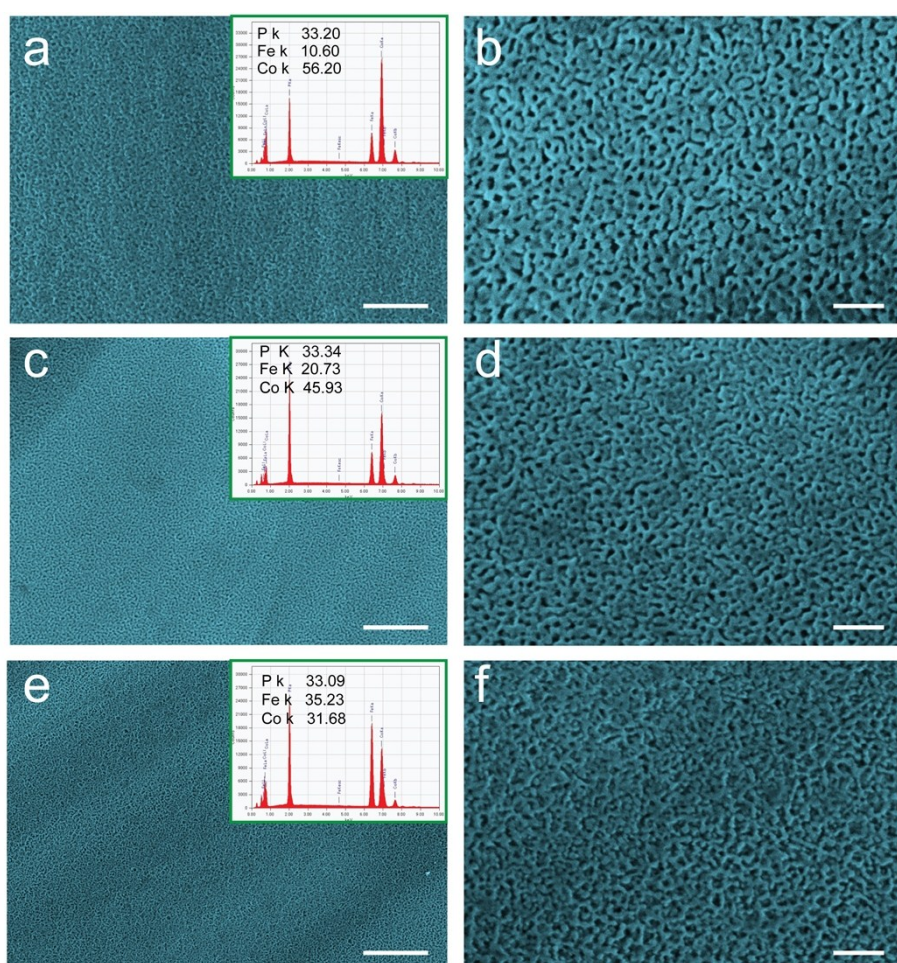

**Figure S7** SEM images of np-(Co<sub>1-x</sub>Fe<sub>x</sub>)<sub>2</sub>P with different Co/Fe compositions prepared by changing the Co/Fe ratios of precursor Co-Fe-P ribbons. (a, b) (Co<sub>0.84</sub>Fe<sub>0.16</sub>)<sub>2</sub>P, (c, d) (Co<sub>0.69</sub>Fe<sub>0.31</sub>)<sub>2</sub>P, and (e, f) (Co<sub>0.47</sub>Fe<sub>0.53</sub>)<sub>2</sub>P. Insets are EDS spectra showing the compositions of the np-(Co<sub>1-x</sub>Fe<sub>x</sub>)<sub>2</sub>P. (a), (c) and (e) the low magnification SEM images show a uniform nanoporous structure across the entire samples. Scale bars: (a), (c) and (e) 1 μm; (b), (d) and (f) 200 nm.



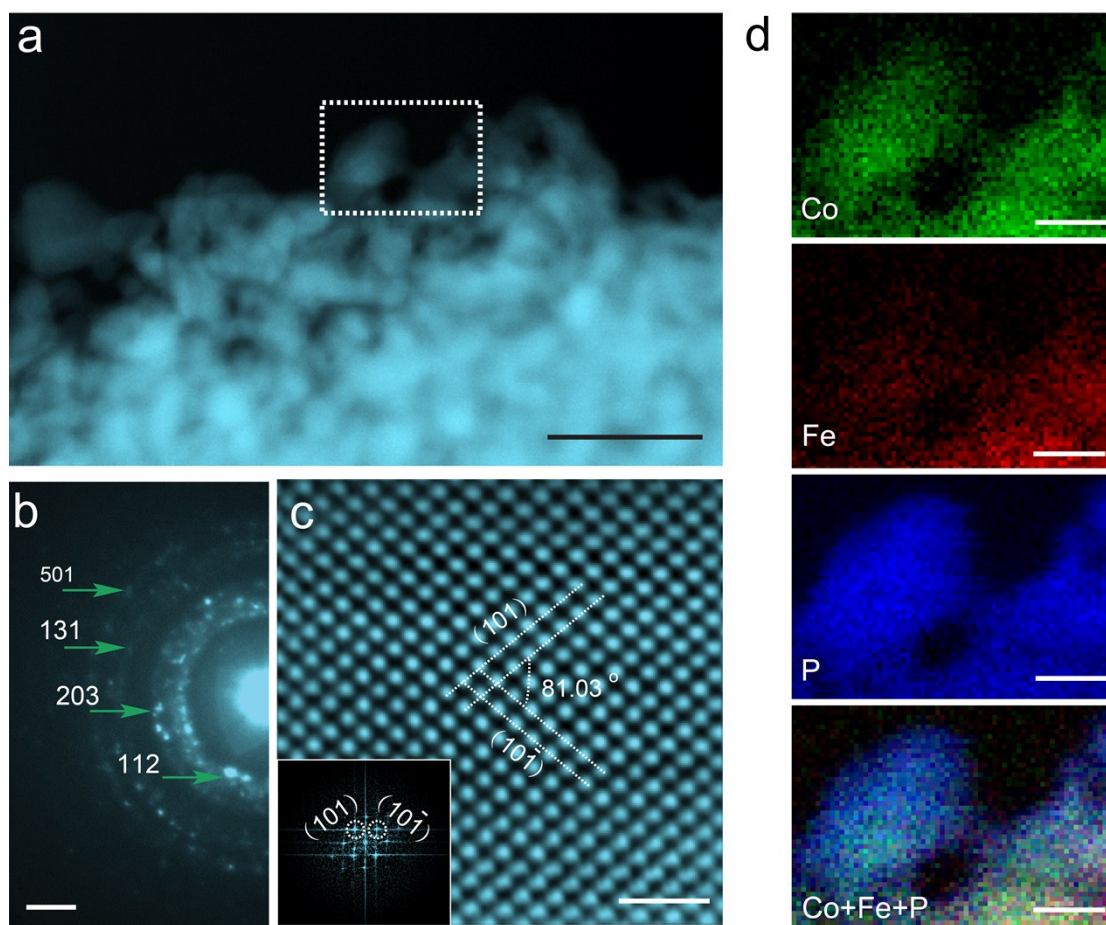

**Figure S8 Structure analyses of nanoporous  $(\text{Co}_{0.52}\text{Fe}_{0.48})_2\text{P}$ .** (a) High-angle annular dark-field scanning transmission electron micrograph (HAADF-STEM) images of the nanoporous  $(\text{Co}_{0.52}\text{Fe}_{0.48})_2\text{P}$ . (b) Selected area electron diffraction (SAED) of np- $(\text{Co}_{0.52}\text{Fe}_{0.48})_2\text{P}$ . (c) HRTEM images of lattice crystalline of np- $(\text{Co}_{0.52}\text{Fe}_{0.48})_2\text{P}$ . (d) STEM-EELS element mappings of np- $(\text{Co}_{0.52}\text{Fe}_{0.48})_2\text{P}$  showing the uniform distribution of Co, Fe, and P in the nanoporous structure. Scale bars: (a) 50 nm; (b) 1/5 nm, (c) 1 nm, and (d) 20 nm.

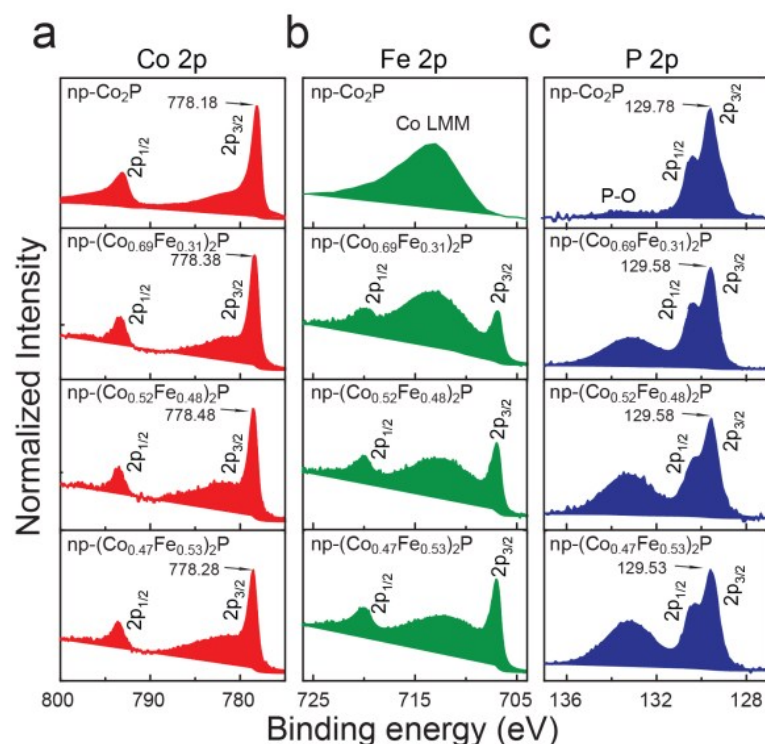

**Figure S9** XPS spectra of binary np-Co<sub>2</sub>P and np-(Co<sub>1-x</sub>Fe<sub>x</sub>)<sub>2</sub>P. (a) Co 2p, (b) Fe 2p, and (c) P 2p region. The Co 2p<sub>3/2</sub> binding energy of np-(Co<sub>1-x</sub>Fe<sub>x</sub>)<sub>2</sub>P show slightly positive shift compared with np-Co<sub>2</sub>P. Moreover, the Co 2p<sub>3/2</sub> binding energies of np-(Co<sub>0.52</sub>Fe<sub>0.48</sub>)<sub>2</sub>P exhibit a slightly larger positive shift compared to np-(Co<sub>0.47</sub>Fe<sub>0.53</sub>)<sub>2</sub>P and np-(Co<sub>0.69</sub>Fe<sub>0.31</sub>)<sub>2</sub>P, suggesting that more electron transfer occurs in the np-(Co<sub>0.52</sub>Fe<sub>0.48</sub>)<sub>2</sub>P.

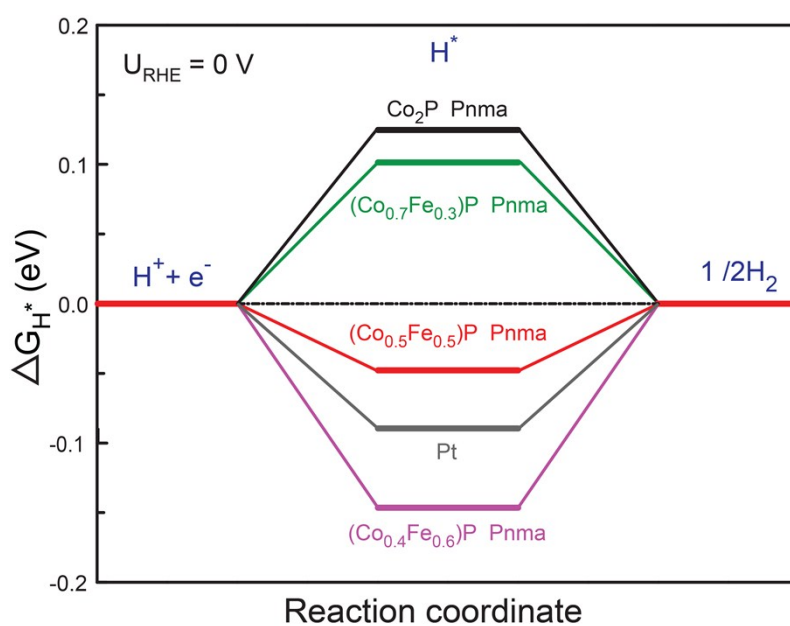

**Figure S10** The DFT calculations of HER free energy diagrams at the equilibrium potential for Pt, Co<sub>2</sub>P, (Co<sub>0.7</sub>Fe<sub>0.3</sub>)<sub>2</sub>P, (Co<sub>0.5</sub>Fe<sub>0.5</sub>)<sub>2</sub>P, and (Co<sub>0.4</sub>Fe<sub>0.6</sub>)<sub>2</sub>P.

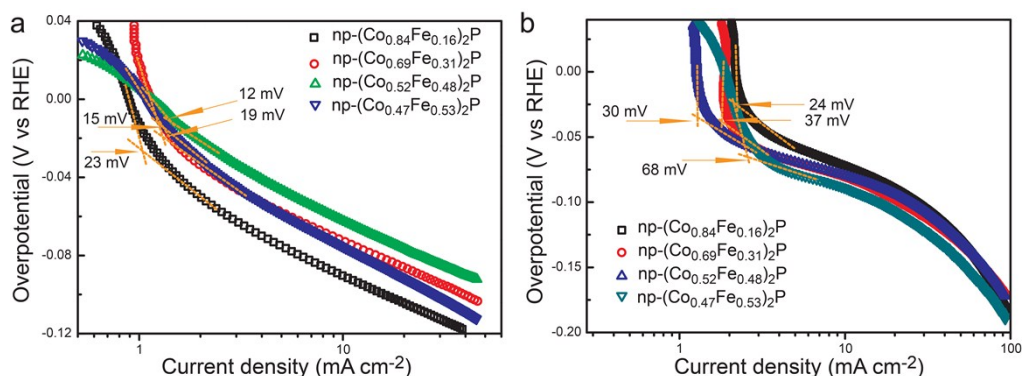

**Figure S11** The onset potentials of np-(Co<sub>1-x</sub>Fe<sub>x</sub>)<sub>2</sub>P with different Co/Fe ratios in (a) 0.5 M H<sub>2</sub>SO<sub>4</sub>; and (b) 1.0 M KOH

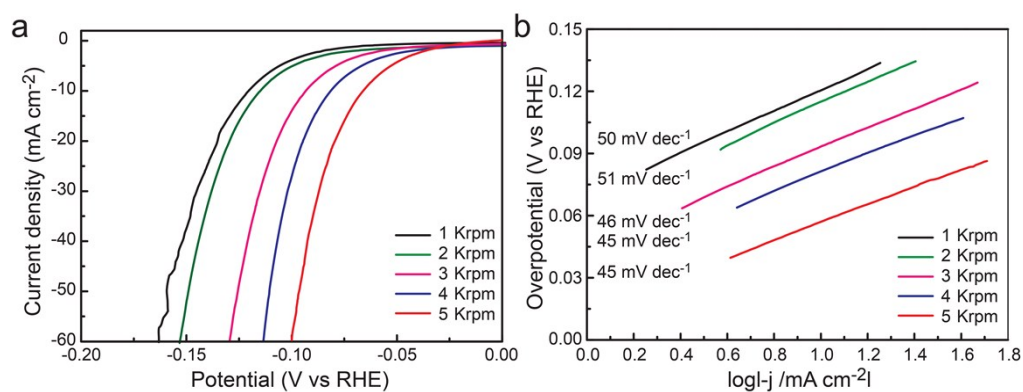

**Figure S12** HER performance of np-(Co<sub>0.52</sub>Fe<sub>0.48</sub>)<sub>2</sub>P with different pore sizes in 0.5 M H<sub>2</sub>SO<sub>4</sub>. (a) Polarization curves and (b) Tafel plots.

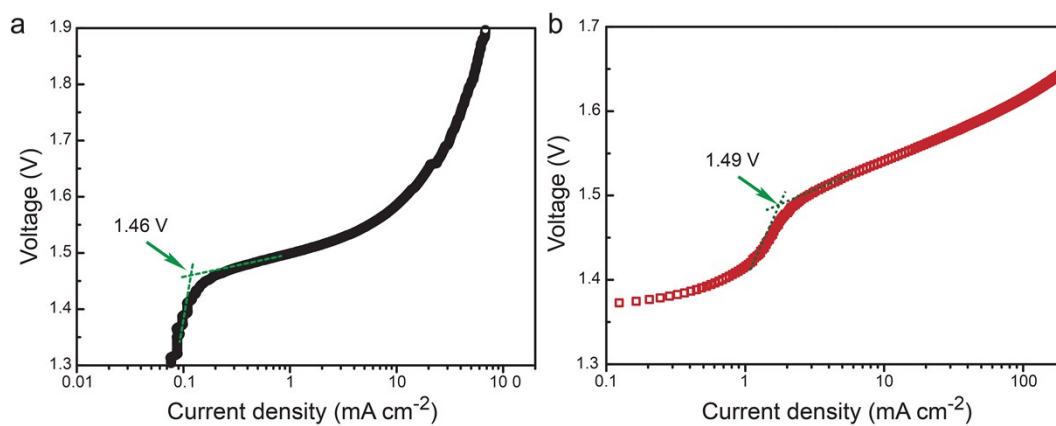

**Figure S13** The onset potentials of IrO<sub>2</sub>-Pt/C and np-(Co<sub>0.52</sub>Fe<sub>0.48</sub>)<sub>2</sub>P electrodes for two-electrodes water splitting. (a) IrO<sub>2</sub>-Pt/C; (b) np-(Co<sub>0.52</sub>Fe<sub>0.48</sub>)<sub>2</sub>P

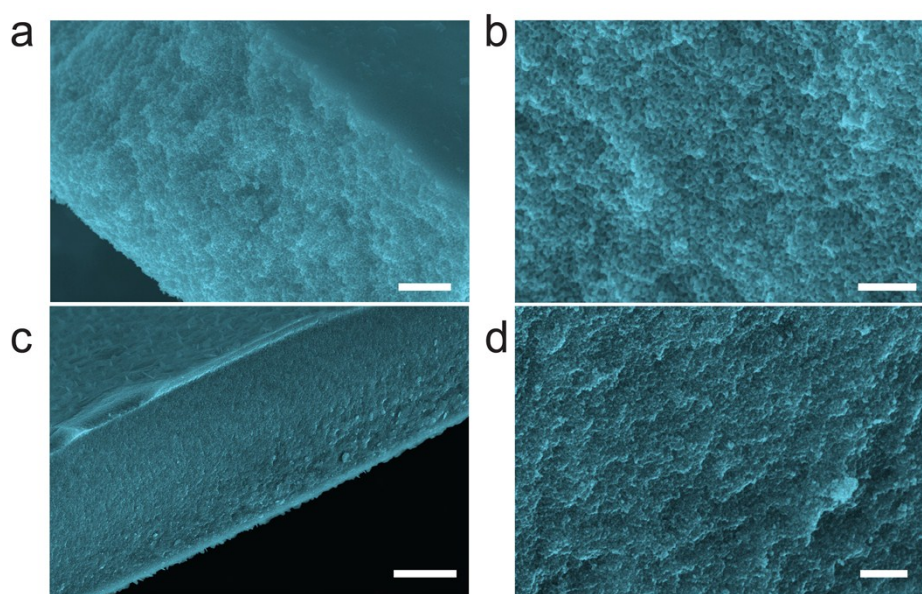

**Figure S14** Cross-section SEM images of np-(Co<sub>0.52</sub>Fe<sub>0.48</sub>)<sub>2</sub>P after long-time operation in a basic solution. (a, b) anode, (c, d) cathode. Scale bars: (a) 1 μm, (b) 500 nm, (c) 5 μm, and (d) 500 nm.



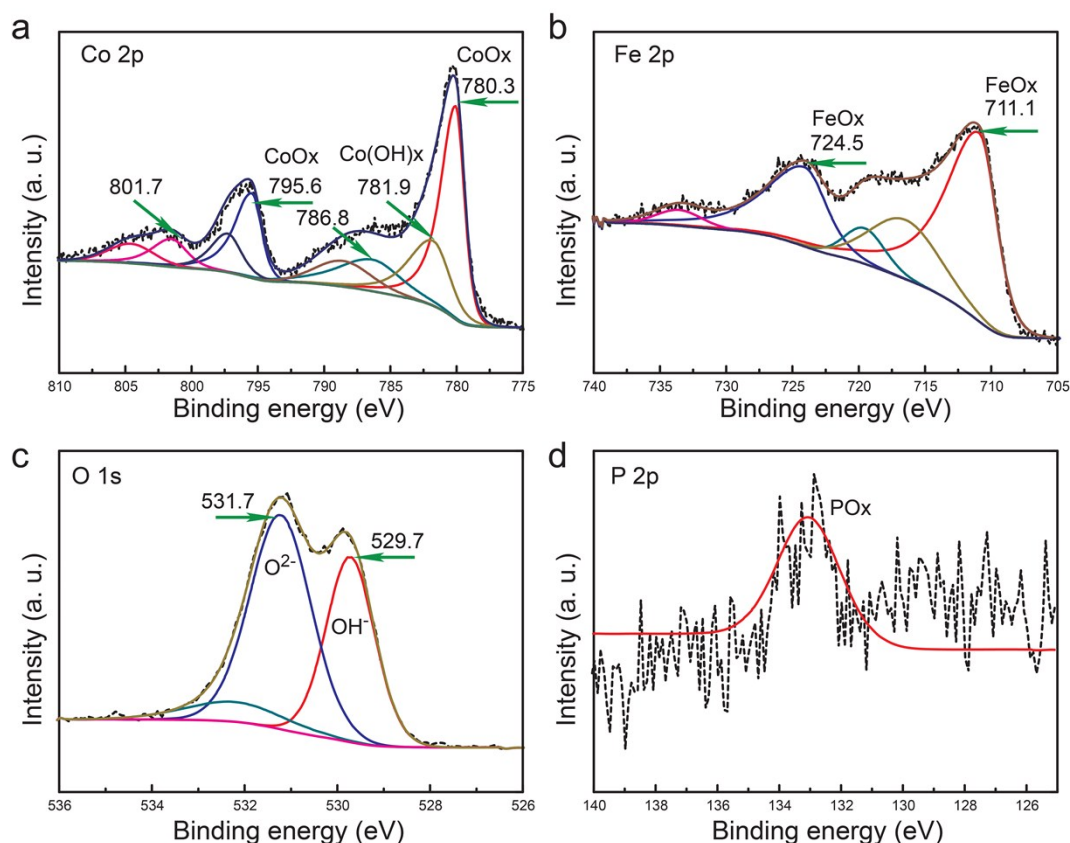

**Figure S15 XPS spectra of np-(Co<sub>0.52</sub>Fe<sub>0.48</sub>)<sub>2</sub>P after OER testing.** (a) Co 2p, (b) Fe 2p, (c) O 1s, and (d) P 2p region. The Co 2p spectrum of the post-OER np-(Co<sub>0.52</sub>Fe<sub>0.48</sub>)<sub>2</sub>P displays two peaks at 780.3 and 795.6 eV, which can be assigned to oxidized cobalt, while the peak at 781.9 is assigned to cobalt hydroxo species.<sup>2, 3</sup> In the spectra region of Fe 2p, the two peaks at 711.1 and 724.5 eV can be assigned to oxidized iron. The dominant contribution at 529.7 eV corresponding to the oxygen from oxides/hydroxides appears, along with the typical surface hydroxyl species at 531.1 eV.<sup>4</sup> A single peak located at 133.2 eV in P 2p spectrum is ascribed to phosphate species, as well as the complete disappearance of the phosphide components around the binding energy of 129.6 eV.<sup>5</sup> These results indicate the reassembly of the np-(Co<sub>0.52</sub>Fe<sub>0.48</sub>)<sub>2</sub>P surface during anodic electrochemical oxygen evolution. Therefore, the synergistic effect from the cobalt iron oxo/hydroxo species and phosphate species contributes to the improved oxygen evolution performance.

**Table S1** Calculated hydrogen adsorption free energy  $\Delta G_H$ . The DFT calculations were performed on different phosphide compounds according to the Ref. 1. For HER activities, the (101) surfaces are considered as the most likely active surfaces in the Pnma space group structure.

| compound                                     | space group | surface | structure                                                                            | site         | $\Delta G_H(\text{eV})$ |
|----------------------------------------------|-------------|---------|--------------------------------------------------------------------------------------|--------------|-------------------------|
| $\text{Co}_2\text{P}$                        | Pnma        | (101)   | 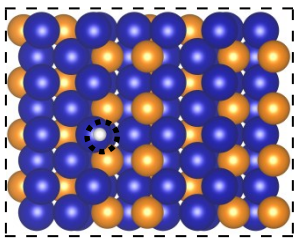   | Co           | 0.12467                 |
| $(\text{Co}_{0.7}\text{Fe}_{0.3})_2\text{P}$ | Pnma        | (101)   |   | Co           | 0.10285                 |
| $(\text{Co}_{0.5}\text{Fe}_{0.5})_2\text{P}$ | Pnma        | (101)   |  | Fe-Co-bridge | -0.0477                 |
| $(\text{Co}_{0.4}\text{Fe}_{0.6})_2\text{P}$ | Pnma        | (101)   |  | Fe-bridge    | -0.14798                |

\*The adsorbed H sites in the model are highlighted by dashed circles



**Table S2** HER performances of np-(Co<sub>0.52</sub>Fe<sub>0.48</sub>)<sub>2</sub>P and other reported electrocatalysts in acidic electrolytes. (\*j: current density;  $\eta$ : overpotential;  $\eta_0$ : onset potential)

| Catalysts                                                      | Substrate         | electrolyte                             | $\eta_0$<br>(mV) | $\eta$ (mV)<br>) at<br>j=10 mA<br>cm <sup>-2</sup> | Tafel<br>slope<br>(mV<br>dec <sup>-1</sup> ) | Reference                                               |
|----------------------------------------------------------------|-------------------|-----------------------------------------|------------------|----------------------------------------------------|----------------------------------------------|---------------------------------------------------------|
| np-<br>(Co <sub>0.52</sub> Fe <sub>0.48</sub> ) <sub>2</sub> P | Free-<br>standing | 0.5 M<br>H <sub>2</sub> SO <sub>4</sub> | 12               | 64                                                 | 45                                           | This work                                               |
| Co <sub>2</sub> P NPs                                          | GEC               | 0.5 M<br>H <sub>2</sub> SO <sub>4</sub> | N/A              | 95                                                 | 45                                           | <i>Chem. Mater.</i> <b>2015</b> ,<br>27, 3769           |
| Co <sub>2</sub> P nanorods                                     | Ti foil           | 0.5 M<br>H <sub>2</sub> SO <sub>4</sub> | N/A              | 134                                                | 71                                           | <i>Nano Energy</i> <b>2014</b> ,<br>9, 373              |
| Porous Co-<br>based film                                       | Au film           | 0.5 M<br>H <sub>2</sub> SO <sub>4</sub> | 35               | 150                                                | 53                                           | <i>Adv. Mater.</i> <b>2015</b> ,<br>27, 3175            |
| CoP                                                            | Ti foil           | 0.5 M<br>H <sub>2</sub> SO <sub>4</sub> | N/A              | N/A                                                | 50                                           | <i>Angew. Chem.Int.<br/>Ed.</i> <b>2014</b> , 53, 6710  |
| CoP                                                            | Carbon<br>cloth   | 0.5 M<br>H <sub>2</sub> SO <sub>4</sub> | 38               | 75                                                 | 51                                           | <i>J. Am. Chem. Soc.</i><br><b>2014</b> , 136, 7587     |
| CoP/CNT                                                        | GEC               | 0.5 M<br>H <sub>2</sub> SO <sub>4</sub> | 40               | 122                                                | 54                                           | <i>Angew. Chem. Int.<br/>Ed.</i> <b>2014</b> , 53, 5427 |
| CoP                                                            | Ti foil           | 0.5 M<br>H <sub>2</sub> SO <sub>4</sub> | 40               | 90                                                 | 43                                           | <i>Chem. Mater.</i> <b>2014</b> ,<br>26, 4326           |
| Ni <sub>2</sub> P NPs                                          | GEC               | 0.5 M<br>H <sub>2</sub> SO <sub>4</sub> | >50              | 117                                                | 46                                           | <i>J. Am. Chem. Soc.</i><br><b>2013</b> , 135, 9267     |
| Ni <sub>12</sub> P <sub>5</sub>                                | Ti foil           | 0.5 M<br>H <sub>2</sub> SO <sub>4</sub> | N/A              | 107                                                | 63                                           | <i>Acs Nano</i> <b>2014</b> , 8,<br>8121                |
| Cu <sub>3</sub> P NW                                           | CF                | 0.5 M<br>H <sub>2</sub> SO <sub>4</sub> | 62               | 143                                                | 67                                           | <i>Angew. Chem. Int.<br/>Ed.</i> <b>2014</b> , 53, 9577 |
| MoP                                                            | GCE               | 0.5 M<br>H <sub>2</sub> SO <sub>4</sub> | 40               | 125                                                | 54                                           | <i>Adv. Mater.</i> <b>2014</b> ,<br>26, 5702            |
| Mo <sub>2</sub> C/CNT                                          | CP                | 0.1 M<br>HClO <sub>4</sub>              | N/A              | 63                                                 | 55.2                                         | <i>Energ. Environ. Sci.</i><br><b>2013</b> , 6, 943     |
| P-WC/RGO                                                       | GCE               | 0.5 M<br>H <sub>2</sub> SO <sub>4</sub> | 46               | 85                                                 | 54                                           | <i>Angew. Chem. Int.<br/>Ed.</i> <b>2015</b> , 54, 6325 |
| Porous Mo <sub>2</sub> C                                       | GCE               | 0.5 M<br>H <sub>2</sub> SO <sub>4</sub> | 25               | 142                                                | 53                                           | <i>Nat. Commun.</i><br><b>2015</b> , 6, 6512            |
| Co-NRCNT                                                       | GCE               | 0.5 M<br>H <sub>2</sub> SO <sub>4</sub> | 50               | 260                                                | 69                                           | <i>Angew. Chem.Int.<br/>Ed.</i> <b>2014</b> , 56, 4461  |
| Double-gyroid<br>MoS <sub>2</sub>                              | FTO               | 0.5 M<br>H <sub>2</sub> SO <sub>4</sub> | N/A              | ~220                                               | 50                                           | <i>Nat.Mater.</i> <b>2012</b> ,<br>11, 963              |
| WS <sub>2</sub> nanosheets                                     | GCE               | 0.5 M<br>H <sub>2</sub> SO <sub>4</sub> | N/A              | ~240                                               | 55                                           | <i>Nat.Mater.</i> <b>2013</b> ,<br>12, 850              |

**Table S3** HER performances of np-(Co<sub>0.52</sub>Fe<sub>0.48</sub>)<sub>2</sub>P and other reported electrocatalysts in basic electrolytes (\*j: current density;  $\eta$ : overpotential;  $\eta_0$ : onset potential).

| Catalysts                                                         | Substrate         | electrolyte  | $\eta_0$<br>(mV) | $\eta$ (mV)<br>at<br>$j=10$<br>$\text{mA cm}^{-2}$ | Tafel<br>slope<br>(mV<br>$\text{dec}^{-1}$ ) | Reference                                               |
|-------------------------------------------------------------------|-------------------|--------------|------------------|----------------------------------------------------|----------------------------------------------|---------------------------------------------------------|
| np-<br>(Co <sub>0.52</sub> Fe <sub>0.48</sub> ) <sub>2</sub><br>P | Free-<br>standing | 1.0 M<br>KOH | 30               | 79                                                 | 40                                           | This work                                               |
| Co <sub>2</sub> P<br>nanorods                                     | Ti foil           | 1.0 M<br>KOH | N/A              | 152                                                | N/A                                          | <i>Nano Energy</i> <b>2014</b> , 9, 373                 |
| Porous Co-<br>based film                                          | Au film           | 1.0 M<br>KOH | N/A              | ~375                                               | N/A                                          | <i>Adv. Mater.</i> <b>2015</b> , 27,<br>3175            |
| Co-NRCNT                                                          | GCE               | 1.0 M<br>KOH | N/A              | 370                                                | N/A                                          | <i>Angew. Chem. Int. Ed.</i><br><b>2014</b> , 53, 4372  |
| Ni <sub>2</sub> P                                                 | GEC               | 1.0 M<br>KOH | N/A              | 205                                                | N/A                                          | <i>J. Am. Chem. Soc.</i> <b>2013</b> ,<br>135, 9267     |
| CoP                                                               | CC                | 1.0 M<br>KOH | N/A              | 209                                                | 129                                          | <i>J. Am. Chem. Soc.</i> <b>2014</b> ,<br>136, 7587     |
| FeP NAs NW                                                        | CC                | 1.0 M<br>KOH | N/A              | 218                                                | 146                                          | <i>ACS Catal.</i> <b>2014</b> , 4 4065                  |
| MoB                                                               | GCE               | 0.1 M<br>KOH | N/A              | 225                                                | 59                                           | <i>Angew. Chem. Int. Ed.</i><br><b>2012</b> , 51, 12703 |
| Porous Mo <sub>2</sub> C                                          | GCE               | 1.0 M<br>KOH | 80               | 151                                                | 59                                           | <i>Nat. Commun.</i> <b>2015</b> , 6,<br>6512            |
| Ni/Ni(OH) <sub>2</sub>                                            | GCE               | 0.1M<br>KOH  | N/A              | 300                                                | 128                                          | <i>Angew. Chem. Int. Ed.</i><br><b>2012</b> , 51, 12495 |
| Ni/NiO/CNT                                                        | GCE               | 1.0 M<br>KOH | N/A              | 80                                                 | 82                                           | <i>Nat. Commun.</i> <b>2014</b> , 4,<br>4695            |
| Co/Co <sub>3</sub> O <sub>4</sub>                                 | Ni foam           | 1.0 M<br>KOH | 30               | 90                                                 | 44                                           | <i>Nano.Lett.</i> <b>2015</b> , 15, 6015.               |
| WC                                                                | Ni foam           | 0.1M<br>KOH  | N/A              | 220                                                | N/A                                          | <i>J. Am. Chem. Soc.</i> <b>2015</b> ,<br>137, 5480     |

**Table S4** Comparison of reported nonprecious metal electrocatalysts for OER in basic electrolytes. ( $j$ : current density;  $\eta$ : overpotential)

| Catalysts                                                  | Substrate     | electrolyte | $\eta$ (mV) at $j=10 \text{ mA cm}^{-2}$ | Tafel slope (mV dec <sup>-1</sup> ) | Reference                                           |
|------------------------------------------------------------|---------------|-------------|------------------------------------------|-------------------------------------|-----------------------------------------------------|
| np-(Co <sub>0.52</sub> Fe <sub>0.48</sub> ) <sub>2</sub> P | Free-standing | 1.0 M KOH   | 270                                      | 30                                  | This work                                           |
| Co-P film                                                  | Co foil       | 1.0 M KOH   | 345                                      | 47                                  | <i>Angew. Chem. Int. Ed.</i> <b>2015</b> , 54, 6251 |
| NiCo LHD                                                   | GCE           | 1.0 M KOH   | 367                                      | 40                                  | <i>Nano. Lett.</i> <b>2015</b> , 15, 1421           |
| CoCo LHD                                                   | GCE           | 1.0 M KOH   | 393                                      | 59                                  | <i>Nat. Commun.</i> <b>2014</b> , 5, 4477           |
| NiFeO <sub>x</sub> film                                    | CC            | 1.0 M KOH   | >350                                     | N/A                                 | <i>J. Am. Chem. Soc.</i> <b>2013</b> , 135, 16977   |
| MnO <sub>2</sub> film                                      | CC            | 1.0 M KOH   | 563                                      | 49                                  | <i>J. Am. Chem. Soc.</i> <b>2013</b> , 134, 17253   |
| CoO NG                                                     | GCE           | 0.1 M KOH   | 340                                      | 71                                  | <i>Energy Environ. Sci.</i> <b>2014</b> , 7, 609    |
| Co <sub>x</sub> O <sub>y</sub> /NC                         | GCE           | 0.1 M KOH   | 430                                      | N/A                                 | <i>Angew. Chem. Int. Ed.</i> <b>2014</b> , 53, 8508 |
| Ni <sub>x</sub> Co <sub>3-x</sub> O <sub>4</sub> nanowire  | GCE           | 1.0 M KOH   | 370                                      | 59-64                               | <i>Adv. Mater.</i> <b>2010</b> , 22, 1924           |
| De-LiCoO <sub>2</sub>                                      | GCE           | 0.1 M KOH   | 400                                      | 50                                  | <i>Nat. Commun.</i> <b>2014</b> , 5, 4345           |
| CoMn LDH                                                   | GCE           | 1.0 M KOH   | 324                                      | 43                                  | <i>J. Am. Chem. Soc.</i> <b>2014</b> , 136, 16481   |
| CO <sub>3</sub> O <sub>4</sub> /rm-GO                      | Ni foam       | 1.0 M KOH   | 310                                      | 67                                  | <i>Nat. Mater.</i> <b>2011</b> , 10, 780            |
| CoO <sub>x</sub> film                                      | Ni foam       | 1.0 KOH     | 403                                      | 42                                  | <i>J. Am. Chem. Soc.</i> <b>2012</b> , 134, 17253   |

**Table S5** Bifunctional electrocatalyst for overall water splitting in 1.0 M KOH solution. ( $j$ : current density;  $\eta$ : overpotential)

| Catalysts<br>(Cathode (H <sub>2</sub> ))                       | Catalysts<br>(anode (O <sub>2</sub> ))                         | Substrate         | $\eta$ at<br>$j=10$<br>mA<br>cm <sup>-2</sup><br>(V) | Reference                                             |
|----------------------------------------------------------------|----------------------------------------------------------------|-------------------|------------------------------------------------------|-------------------------------------------------------|
| np-<br>(Co <sub>0.52</sub> Fe <sub>0.48</sub> ) <sub>2</sub> P | np-<br>(Co <sub>0.52</sub> Fe <sub>0.48</sub> ) <sub>2</sub> P | Free-<br>standing | 1.53                                                 | This works                                            |
| NiFe LDH                                                       | NiFe LDH                                                       | Ni foam           | ~1.70                                                | <i>Science</i> <b>2014</b> , 345, 1593                |
| CoO <sub>x</sub> /NC                                           | CoO <sub>x</sub> /NC                                           | Ni foam           | 1.62                                                 | <i>J. Am. Chem. Soc.</i> <b>2015</b> , 137, 2688      |
| NiSe NWs                                                       | NiSe NWS                                                       | Ni foam           | 1.63                                                 | <i>Angew. Chem. Int. Ed.</i> <b>2015</b> , 54, 9351   |
| Ni-Fe-O                                                        | Ni-Fe-O                                                        | Ni foam           | 1.51                                                 | <i>Nat. Commun.</i> <b>2015</b> , 6, 7261             |
| Ni <sub>0.33</sub> Co <sub>0.67</sub> S <sub>2</sub>           | NiCoO <sub>4</sub>                                             | Ti foil           | ~1.73                                                | <i>Adv. Energy Mater.</i> <b>2015</b> , 5, 1402031    |
| Ni <sub>2</sub> P<br>nanoparticle                              | Ni <sub>2</sub> P<br>nanoparticle                              | Ni foam           | 1.63                                                 | <i>Energy Environ. Sci.</i> <b>2015</b> , 8, 2347     |
| Ni <sub>4</sub> P <sub>5</sub> film                            | Ni <sub>4</sub> P <sub>5</sub> film                            | Ni film           | 1.7                                                  | <i>Angew. Chem. Int. Ed.</i> <b>2015</b> , 54, 12361. |
| Co-P film                                                      | Co-P film                                                      | Co foil           | 1.63                                                 | <i>Angew. Chem. Int. Ed.</i> <b>2015</b> , 54, 6251   |
| EG/Co <sub>0.85</sub> Se/Ni<br>Fe-LDH                          | EG/Co <sub>0.85</sub> Se/Ni<br>Fe-LDH                          | EG foil           | 1.67                                                 | <i>Energy Environ. Sci.</i> <b>2016</b> , 9, 478      |
| CoP nanorod                                                    | CoP nanorod                                                    | Ni foam           | 1.62                                                 | <i>Adv. Funct. Mater.</i> <b>2015</b> , 25, 7337      |
| CP/CTs/Co-S                                                    | CP/CTs/Co-S                                                    | CP                | 1.743                                                | <i>Acs Nano</i> <b>2016</b> , 10, 2342                |
| ONPPGC/OCC                                                     | ONPPGC/OCC                                                     | CC                | 1.66                                                 | <i>Energy Environ. Sci.</i> <b>2016</b> , 9, 1210     |

## References

1. J. Kibsgaard, C. Tsai, K. Chan, J. D. Benck, J. K. Norskov, F. Abild-Pedersen and T. F. Jaramillo, *Energ. Environ. Sci.*, 2015, **8**, 3022-3029.
2. J. Yang, H. Liu, W. N. Martens and R. L. Frost, *J. Phys.Chem. C*, 2010, **114**, 111-119.
3. F. H. Saadi, A. I. Carim, E. Verlage, J. C. Hemminger, N. S. Lewis and M. P. Soriaga, . *J. Phys.Chem. C*, 2014, **118**, 29294–29300.
4. M. C. Biesinger, B. P. Payne, A. P. Grosvenor, L. W. M. Lau, A. R. Gerson and R. S. C. Smart, *Appl. Surf. Sci.*, 2011, **257**, 2717-2730.
5. N. Jiang, B. You, M. Sheng and Y. Sun, *Angew. Chem. Int. Ed.*, 2015, **54**,

6251-6254.
